# Supplementary material for: Dissecting sources of quantitative gene expression pattern divergence between Drosophila species
Source: PubMed Central journal article supplement — Mol Syst Biol. 2012 Aug 14;8:604. doi: 10.1038/msb.2012.35 (PMC3435502; doi:10.1038/msb.2012.35), 2012-08-14
Supplement: msb201235-s3.pdf [file msb201235-s3.pdf]

## Dissecting sources of quantitative gene expression pattern divergence between *Drosophila* species

Zeba Wunderlich, Meghan D. Bragdon, Kelly B. Eckenrode, Tara Lydiard-Martin, Sivanne Pearl-Waserman, and Angela H. DePace

*Corresponding author: Angela DePace, Harvard Medical School*

---

**Review timeline:**

Submission date:

24 February 2012

Accepted:

12 July 2012

---

No Peer Review Process File is available with this article, as one of the reviewers has chosen not to make his/her report public in this case.
